# Supplementary figures and images for: Two-subunit DNA escort mechanism and inactive subunit bypass in an ultra-fast ring ATPase
Source: eLife journal article supplement (doi:10.7554/elife.09224), 2015-10-09

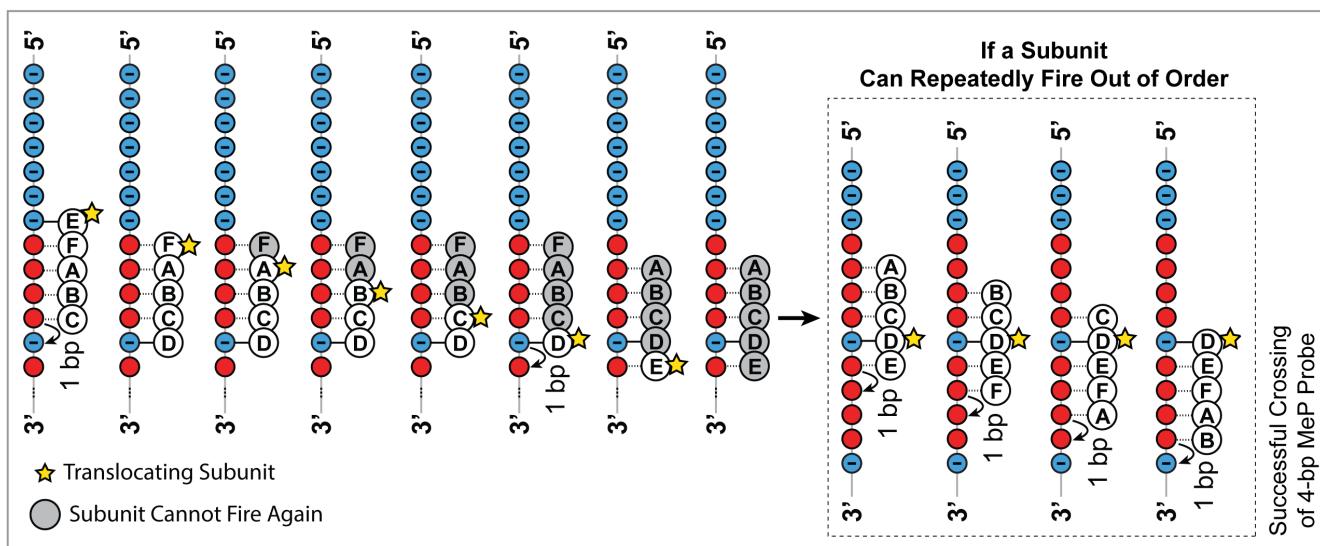

Supplement: supp [file elife-09224-supp-v1.zip]

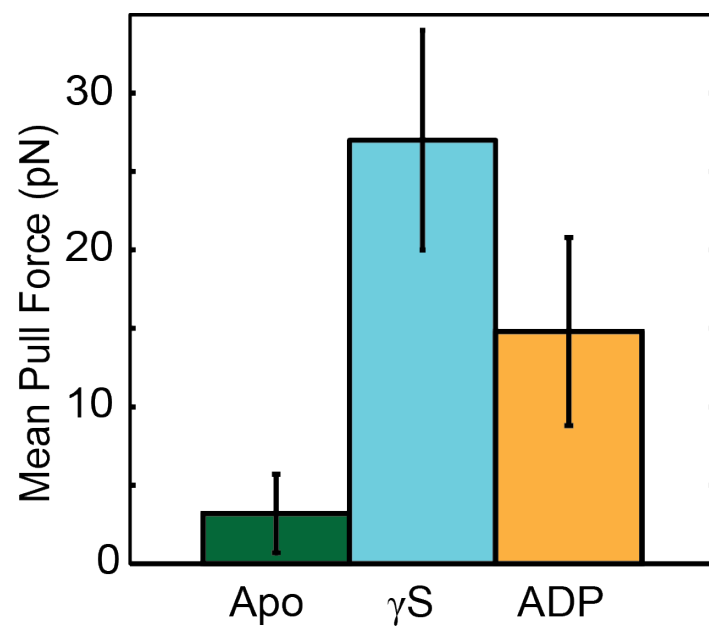

Supplement: supp [file elife-09224-supp-v1.zip]

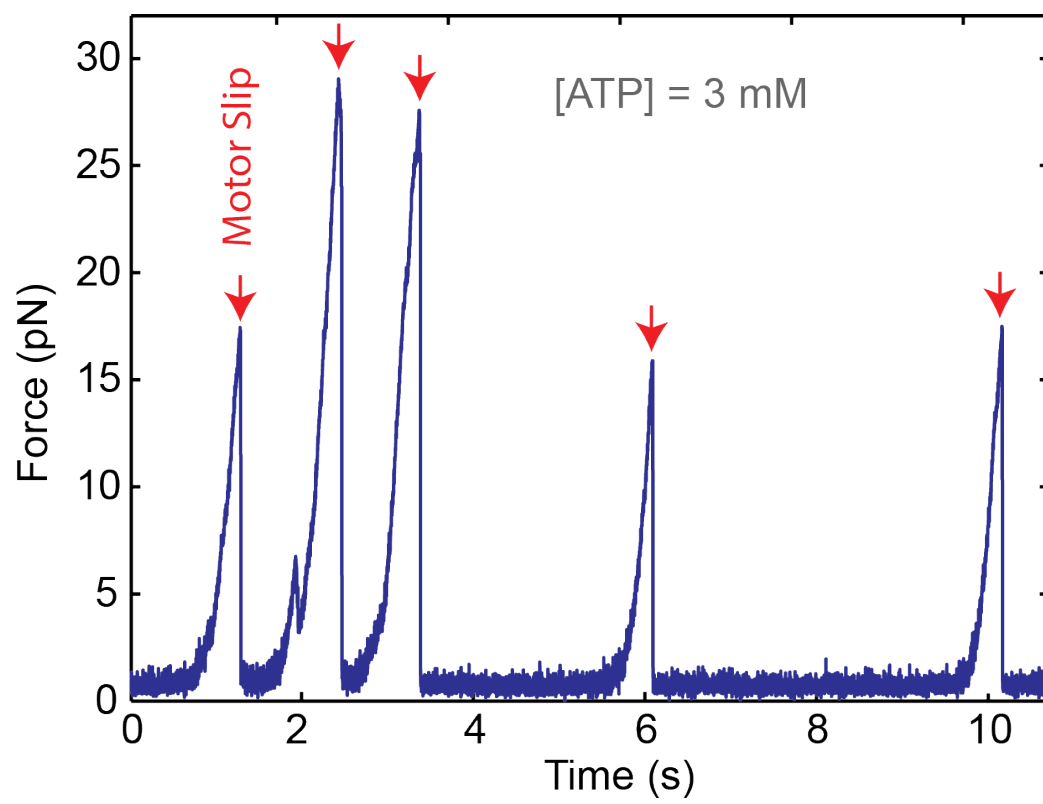

Supplement: supp [file elife-09224-supp-v1.zip]

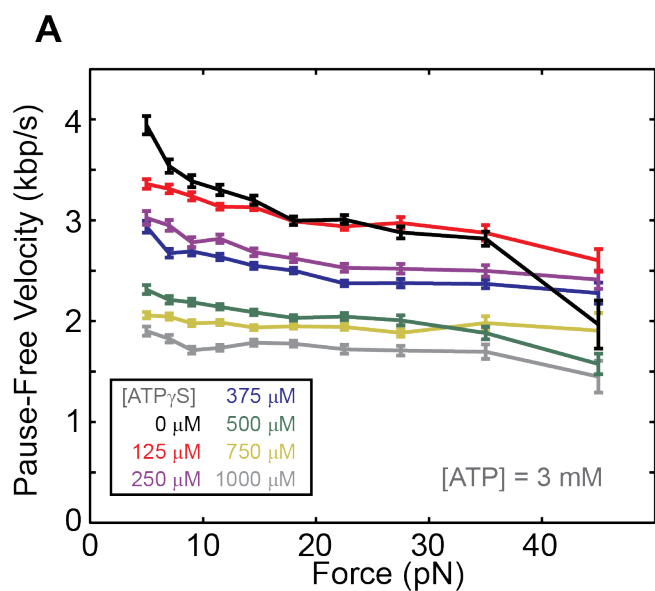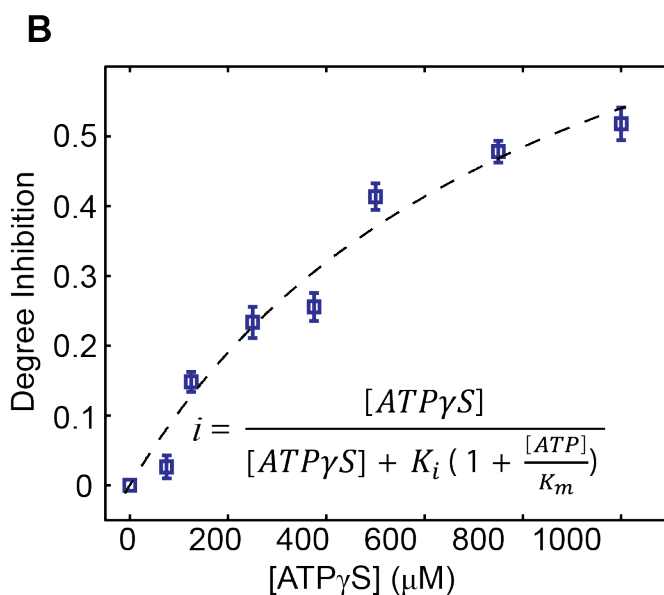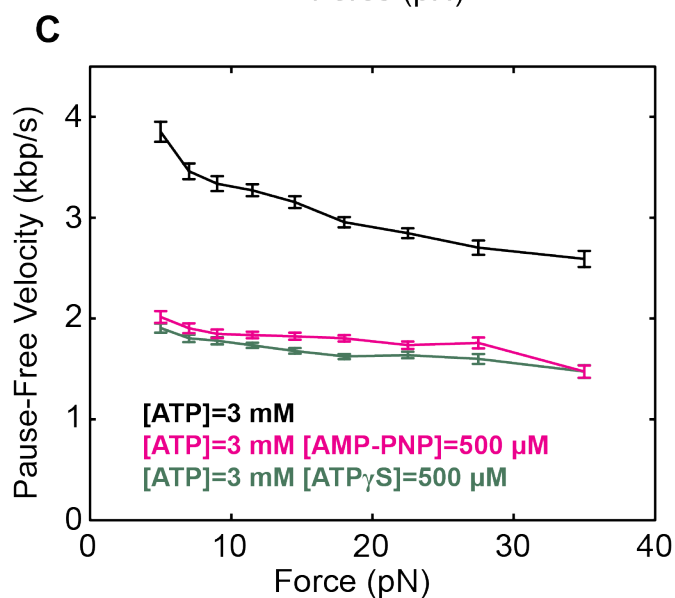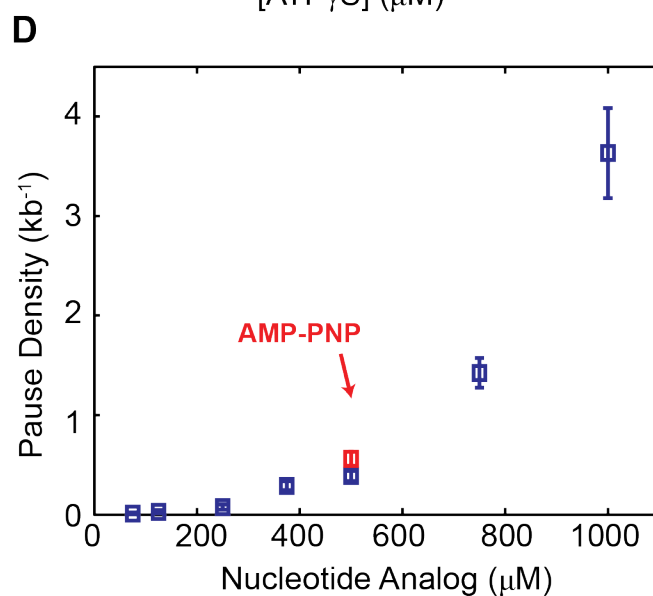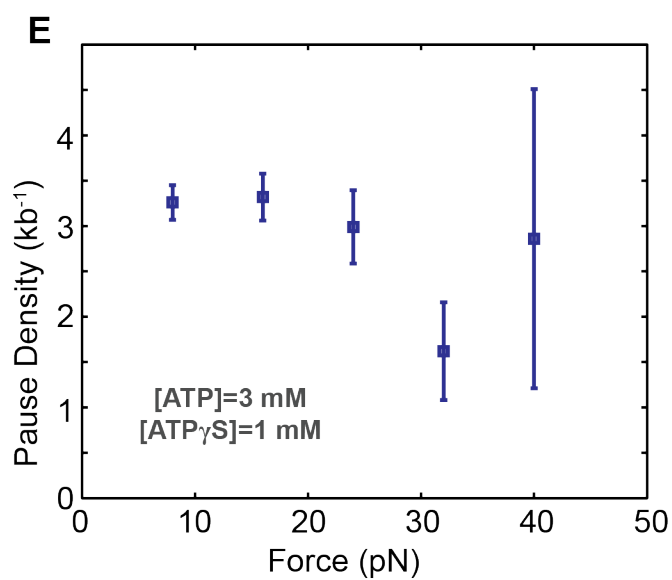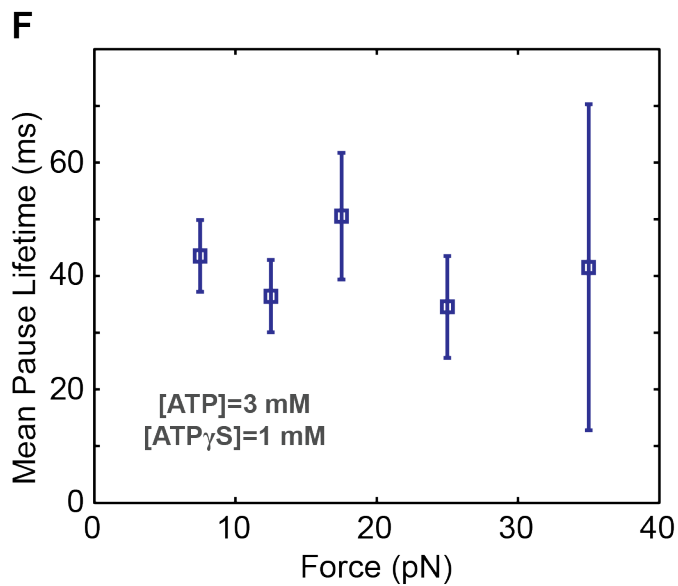

Supplement: supp [file elife-09224-supp-v1.zip]
